# Supplementary material
Source: ML conference proceedings conference paper supplement (https://aclanthology.org/2020.emnlp-main.220)
Supplement: OptionalSupplementaryMaterial [file treebanks-leakage-appendix.pdf › treebanks-leakage-appendix.pdf]

| Treebank                      | Train size | Sent. length | DUG-Iso       | UUG-Iso       | Dep. Length | SoA   | A-Distance   | Open Class |
|-------------------------------|------------|--------------|---------------|---------------|-------------|-------|--------------|------------|
| UD_Norwegian-Nynorsk          | 14174      | 16.4         | 0.4460622105  | 0.4745201853  | 3.3637      | 90.99 | 0.8665833996 | 0.3023     |
| UD_English-LinES              | 3176       | 17.1         | 0.3671497585  | 0.4009661836  | 3.3909      | 81.97 | 0.6920306958 | 0.2957     |
| UD_Hindi_English-HIENCS       | 1448       | 14.6         | 0.1866666667  | 0.2355555556  | 3.0944      | -     | 0.6920306958 | 0.3371     |
| UD_Indonesian-GSD             | 4477       | 21.1         | 0.2172351885  | 0.2567324955  | 3.2941      | 80.05 | 0.8556311769 | 0.323      |
| UD_Latin-ITTB                 | 16809      | 14.2         | 0.5740123751  | 0.590671109   | 3.5285      | 87.08 | 0.871121537  | 0.3263     |
| UD_Estonian-EDT               | 24633      | 15.1         | 0.5314250156  | 0.56565028    | 3.4282      | 85.35 | 0.8179962555 | 0.3681     |
| UD_Croatian-SET               | 6914       | 21.4         | 0.1830985915  | 0.2121478873  | 3.5033      | 87.36 | 0.8067178728 | 0.3417     |
| UD_Gothic-PROIEL              | 3387       | 9.9          | 0.6695821186  | 0.689902818   | 2.7039      | 69.55 | 0.657271987  | 0.3927     |
| UD_Swedish_Sign_Language-SSLC | 87         | 8.3          | 0.4411764706  | 0.4705882353  | 2.461       | -     | 0.6430894309 | 0.7199     |
| UD_Norwegian-Bokmaal          | 15696      | 15.5         | 0.506446622   | 0.5342960289  | 3.2697      | 91.23 | 0.837014502  | 0.2939     |
| UD_Chinese-GSDSimp            | 3997       | 24           | 0.124         | 0.136         | 4.3446      | -     | 0.8492047232 | 0.423      |
| UD_Korean-GSD                 | 4400       | 11.8         | 0.5945399393  | 0.6268958544  | 3.3149      | -     | 0.7685275413 | 0.6286     |
| UD_Swedish-LinES              | 3176       | 16.4         | 0.3835748792  | 0.4115942029  | 3.2923      | 84.08 | 0.6854033755 | 0.2978     |
| UD_Polish-LFG                 | 13774      | 7.6          | 0.9160393746  | 0.9305153445  | 2.4651      | 94.86 | 0.8440236648 | 0.3542     |
| UD_Basque-BDT                 | 5396       | 13.5         | 0.4958310172  | 0.5125069483  | 3.3247      | 19.53 | 0.6527218183 | 0.4065     |
| UD_Slovak-SNK                 | 8483       | 12.3         | 0.5353440151  | 0.561734213   | 2.9443      | 88.85 | 0.8094573643 | 0.3424     |
| UD_Russian-Taiga              | 1435       | 11.6         | 0.4988687783  | 0.5373303167  | 3.069       | 74.24 | 0.5378839894 | 0.3311     |
| UD_Maltese-MUDT               | 1123       | 21.4         | 0.1853281853  | 0.1930501931  | 3.4813      | -     | 0.6145564169 | 0.3543     |
| UD_Ancient_Greek-Perseus      | 11476      | 16           | 0.4640122511  | 0.4777947933  | 3.8495      | 79.39 | 0.7654314907 | 0.3948     |
| UD_Urdu-UDTB                  | 4043       | 27.7         | 0.08971962617 | 0.108411215   | 3.9165      | 83.39 | 0.841273376  | 0.3324     |
| UD_Romanian-RRT               | 8043       | 22.4         | 0.1330589849  | 0.1577503429  | 3.3424      | 86.87 | 0.8831278651 | 0.3573     |
| UD_Latin-PROIEL               | 15917      | 11.2         | 0.6642857143  | 0.696031746   | 3.0528      | 73.61 | 0.8781532678 | 0.4095     |
| UD_Hungarian-Szeged           | 910        | 23.3         | 0.0868596882  | 0.09576837416 | 3.9532      | 82.66 | 0.6152829652 | 0.3145     |
| UD_Hindi-HDTB                 | 13304      | 21           | 0.2684085511  | 0.2963182898  | 3.9823      | 92.41 | 0.83760904   | 0.3189     |
| UD_Classical_Chinese-Kyoto    | 11004      | 5.1          | 0.9493487699  | 0.9585142306  | 2.0204      | -     | 0.8528426551 | 0.5945     |
| UD_Norwegian-NynorskLIA       | 3412       | 10.5         | 0.6332288401  | 0.6384535005  | 3.0822      | 70.34 | 0.6911005505 | 0.1922     |
| UD_Lithuanian-HSE             | 153        | 19.3         | 0.03636363636 | 0.03636363636 | 3.5962      | -     | 0.6733668342 | 0.3858     |
| UD_Slovenian-SSJ              | 6478       | 17.9         | 0.3578680203  | 0.3845177665  | 3.46        | 91.47 | 0.8585490627 | 0.3209     |
| UD_Bulgarian-BTB              | 8907       | 14.1         | 0.5125448029  | 0.54390681    | 3.1301      | 91.22 | 0.8338418134 | 0.3293     |
| UD_Ancient_Greek-PROIEL       | 15014      | 12.7         | 0.5969436485  | 0.6341929322  | 3.1253      | 79.25 | 0.8925683481 | 0.3532     |
| UD_Japanese-GSD               | 7125       | 22.5         | 0.2454545455  | 0.2745454545  | 3.5489      | 83.11 | 0.8978666667 | 0.3524     |
| UD_Telugu-MTG                 | 1051       | 4.9          | 0.9657534247  | 0.9657534247  | 2.0153      | -     | 0.8578351908 | 0.4605     |
| UD_Korean-Kaist               | 23010      | 12.4         | 0.5732400525  | 0.6139046786  | 3.0196      | 86.91 | 0.8922474122 | 0.4483     |
| UD_English-GUM                | 3753       | 17.9         | 0.3483146067  | 0.3808988764  | 3.4364      | 85.05 | 0.7442594169 | 0.2983     |
| UD_Romanian-Nonstandard       | 13739      | 19.9         | 0.3479087452  | 0.3792775665  | 3.5773      | -     | 0.8192152698 | 0.3126     |
| UD_Old_Church_Slavonic-PROIEL | 4124       | 8.8          | 0.7379491674  | 0.7651183173  | 2.5913      | 75.73 | 0.684449004  | 0.3935     |
| UD_Danish-DDT                 | 4383       | 17.7         | 0.3362831858  | 0.3769911504  | 3.5663      | 86.28 | 0.8592071889 | 0.2921     |
| UD_English-ESL                | 4124       | 19.2         | 0.278         | 0.29          | 3.4732      | -     | 0.8911070332 | 0.283      |
| UD_Irish-IDT                  | 858        | 22.3         | 0.2665198238  | 0.2731277533  | 3.5517      | 70.88 | 0.6092859105 | 0.3376     |
| UD_Afrikaans-AfriBooms        | 1315       | 23.7         | 0.08705882353 | 0.09411764706 | 3.3886      | 85.47 | 0.718618826  | 0.2895     |
| UD_Chinese-GSD                | 3997       | 24           | 0.126         | 0.134         | 4.3476      | 76.77 | 0.8487455864 | 0.423      |
| UD_Belarusian-HSE             | 319        | 21.5         | 0.162055336   | 0.1778656126  | 3.6867      | -     | 0.7650282194 | 0.4272     |
| UD_Serbian-SET                | 3328       | 22           | 0.1423076923  | 0.15          | 3.5095      | 88.66 | 0.8114389941 | 0.3358     |
| UD_Russian-GSD                | 3850       | 18.9         | 0.2728785358  | 0.3011647255  | 3.4781      | -     | 0.835298219  | 0.3606     |
| UD_Uyghur-UDT                 | 1656       | 11.5         | 0.5255555556  | 0.5566666667  | 3.211       | 67.05 | 0.5137369954 | 0.5503     |

Table 2: Relevant statistics across 45 UD 2.5 syntactic dependency treebanks, including state-of-the-art (SoA) parser performance figures from the CoNLL 2018 shared task.
